# Supplementary material for: Fire enhances forest degradation within forest edge zones in Africa
Source: Springer Nature journal article supplement (doi:10.1038/s41561-021-00763-8), 2021-07-01
Supplement: MOESM8 [file 41561_2021_763_MOESM8_ESM.xlsx]

## Sheet: Brienen
Field_AGB (Mg/ha)	Globbiomass_AGB (Mg/ha)	Globbiomass_AGB_sd (Mg/ha)
115	158.189
125	158.189
135	84.4816	28.6356
145	183.289	26.3892
155	110.179
165	219.659	86.9314
175	173.627	98.2662
185	239.923	51.3347
195	162.889	83.4071
205	214.813	75.0388
215	182.566	101.152
225	230.239	56.1951
235	230.302	41.0443
245	228.642	32.923
255	257.894	22.4126
265	261.611	20.2828
275	197.613	80.3531
285	246.417	34.5154
295	252.861	25.7555
305	222.215	8.82339
315	269.932	8.47942
325	230.739	63.6073
335	259.346	11.6149
345	320.296
355	275.927
365	262.428	23.9092
375	282.655	3.03501
385	263.346
405	266.569
415	280.903
425	212.7
435	262.188	19.8572
445	283.176
465	263.346
475	277.074	5.41583
505	273.261	14.0224
535	296.271
545	263.076
555	286.16
585	286.16

## Sheet: Santoro
Field_AGB (Mg/ha)	Globbiomass_AGB (Mg/ha)
13.1821	15
20.9142	25
28.8324	35
36.9367	45
45.5174	55
54.5745	65
65.0404	75
76.9152	85
86.9043	95
95.008	105
103.672	115
112.898	125
123.413	135
135.219	145
146.699	155
157.853	165
171.973	175
189.06	185
213.508	195
245.318	205
270.399	215
288.753	225
317.189	235
355.707	245
386.136	255
408.476	265
431.37	275
454.82	285
503.361	295
576.992	305
